# Supplementary material for: Effects of Simultaneous Application of Double Chelating Agents to Pb-Contaminated Soil on the Phytoremediation Efficiency of Indocalamus decorus Q. H. Dai and the Soil Environment
Source: MDPI journal article supplement (doi:10.3390/toxics10120713), 2022-11-22
Supplement: s1 [file s1]

**Table S1.** Chemical reagents and analytical conditions for the modified BCR sequential extraction method.

| Step | Fraction           | Operation                                                                                                                                                                                                                                                                                                   |
|------|--------------------|-------------------------------------------------------------------------------------------------------------------------------------------------------------------------------------------------------------------------------------------------------------------------------------------------------------|
| 1    | Acid-soluble state | 20 mL of HOAc (0.11 M, pH 2.8) was added and shaken for 16 h to obtain the supernatant.                                                                                                                                                                                                                     |
| 2    | Reducible state    | 20 mL $\text{NH}_2\text{OH}\cdot\text{HCl}$ (0.5 M, pH 2) was added and shaken for 16 h to obtain the supernatant.                                                                                                                                                                                          |
| 3    | Oxidizable state   | 10 mL $\text{H}_2\text{O}_2$ was added to the samples and the samples were heated at 85 °C for 1 h; 5 mL $\text{H}_2\text{O}_2$ (30%, pH 2) was added again and the samples were heated at 85 °C for 1 h, then $\text{NH}_4\text{OAc}$ (1 M, pH 2) was added and shaken for 16 h to obtain the supernatant. |
| 4    | Residual state     | Digestion with $\text{HNO}_3\text{-HClO}_4\text{-H}_2\text{O}_2$ .                                                                                                                                                                                                                                          |
